# Supplementary material for: Gastric stability of bare and chitosan-fabricated ferritin and its bio-mineral: implication for potential dietary iron supplements
Source: Royal Society of Chemistry journal article supplement (doi:10.1039/d4dt01839g), 2024-01-01
Supplement: d4dt01839g1.pdf [file d4dt01839g1.pdf]

Electronic Supporting Information

**Gastric stability of bare & chitosan-fabricated ferritin and its bio-mineral: Implication towards potential dietary iron supplement**

Rohit Kumar Raut, Gargee Bhattacharyya, Rabindra K. Behera\*

*Department of Chemistry, National Institute of Technology, Rourkela - 769008, Odisha, India.*

\*To whom correspondence should be addressed: Rabindra K. Behera, Tel: +91-661-2462980; Fax: +91-661-2462651; E-mail: [beherarabi@nitrkl.ac.in](mailto:beherarabi@nitrkl.ac.in)

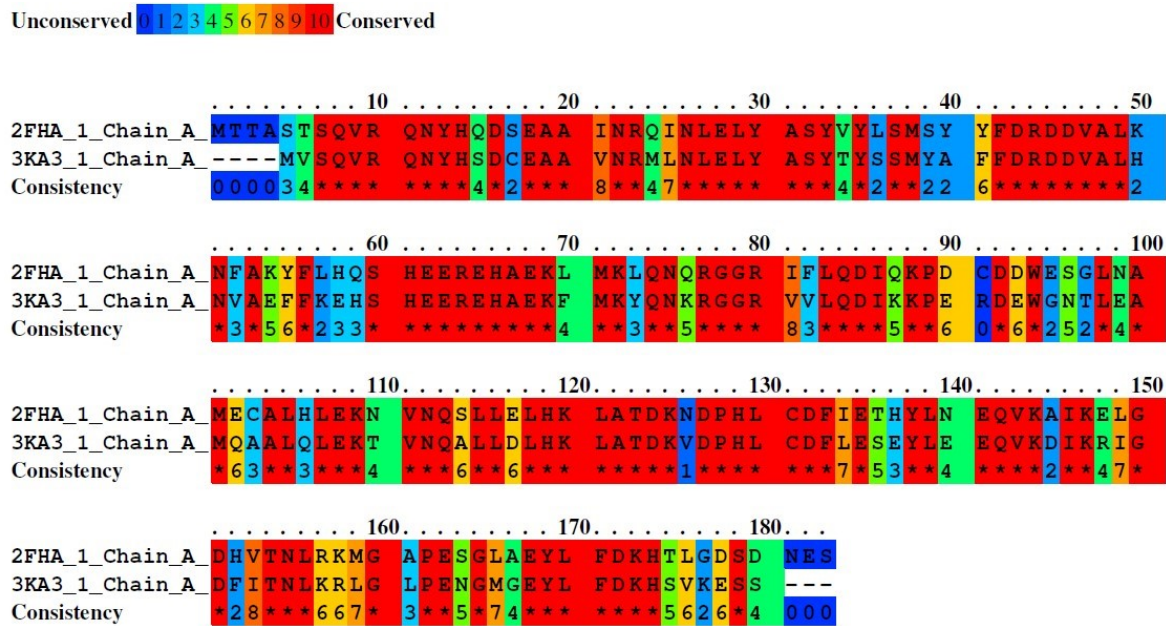

**Figure S1: Sequence alignment of bullfrog M ferritin (1MFR) and human H chain ferritin (2FHA).** The current colour scheme of the alignment is for amino acid conservation. The conservation scoring is performed by PRALINE. The scoring scheme works from 0 up to 10 for the least to the most conserved alignment position respectively. Amino acid position (numbering) is based on human H chain ferritin.

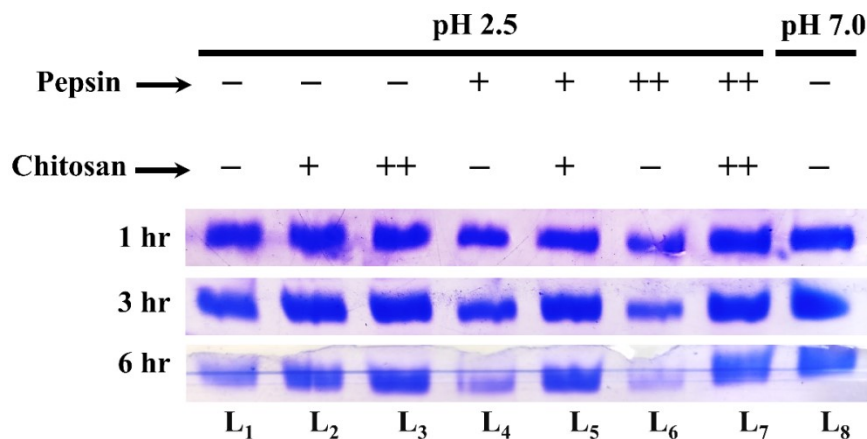

**Figure S2: Effect of chitosan on stability of ferritin protein cage under gastric conditions.** Native PAGE analysis for the digestive stability of bare apo-ferritin samples (1 mg/mL), where (+) and (++) indicate the concentration of chitosan and pepsin at 1 mg/mL and 2 mg/mL respectively. The (-) signs indicate the absence of chitosan/pepsin. L<sub>1</sub> and L<sub>8</sub> are the control reactions (in the absence of pepsin).

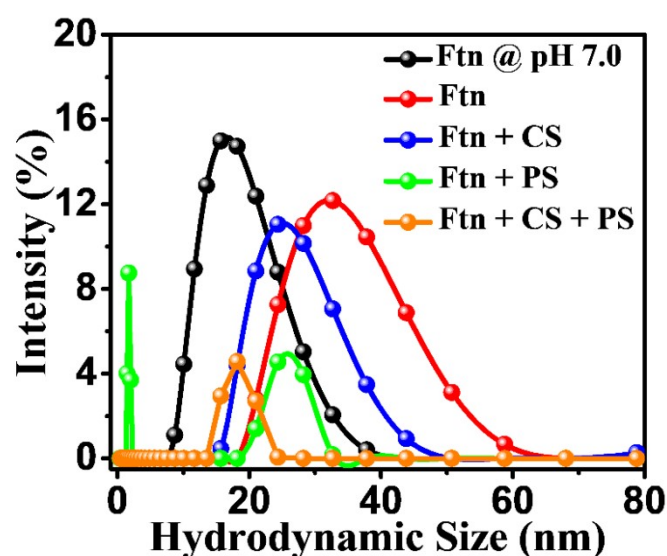

**Figure S3: Effect of pepsin on cage integrity of bare and chitosan-fabricated ferritin samples under gastric condition.** DLS (Intensity distribution) based hydrodynamic sizes (diameter) of bare and chitosan-fabricated ferritin complex. Ferritin, chitosan and pepsin were maintained at same concentration i.e. 0.25 mg/mL. All the samples were incubated at pH 2.5, except in control (in black).

**Table S1: The DLS based size analysis of bare and chitosan-coated apo ferritin samples.** All the samples were incubated at pH 2.5, except in control (ferritin at pH 7.0).

| Samples                               | Number Distribution (nm) | Intensity Distribution (nm) |
|---------------------------------------|--------------------------|-----------------------------|
| Ferritin @ pH 7.0                     | 10.1 ± 0.1               | 14.9 ± 1.1                  |
| Ferritin @ pH 2.5                     | 11.7 ± 0.2               | 30.7 ± 2.8                  |
| Ferritin + Chitosan @ pH 2.5          | 21.2 ± 0.3               | 22.9 ± 2.1                  |
| Ferritin + Pepsin @ pH 2.5            | 1.9 ± 0.2                | 1.9 ± 0.3, 24.2 ± 0.2       |
| Ferritin + Chitosan + Pepsin @ pH 2.5 | 14.6 ± 1.5               | 15.9 ± 0.1                  |

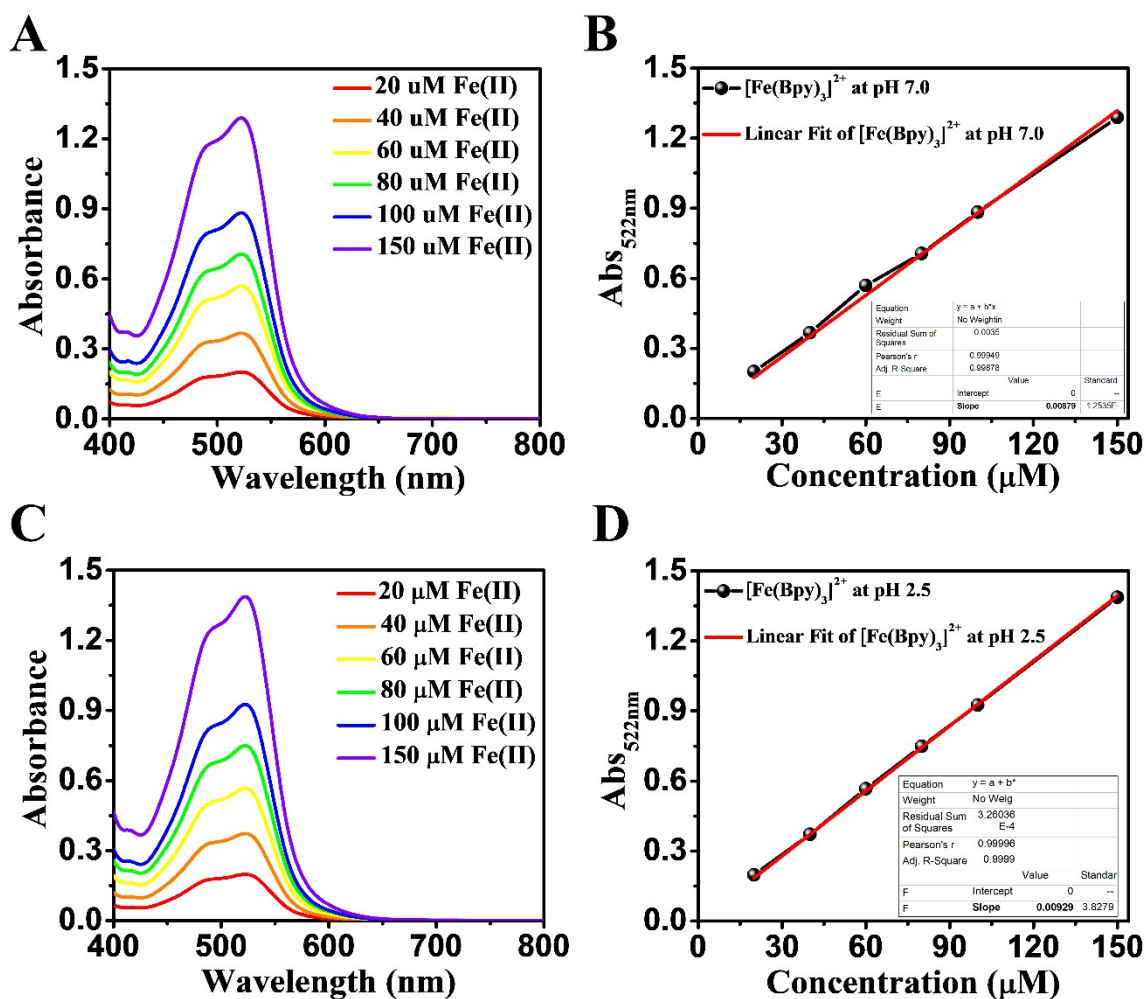

**Figure S4: Determination of molar absorptivity for the Fe(II)-Bpy complex at pH 7.0 and pH 2.5.** The absorption spectra were obtained by monitoring the formation of  $\text{Fe}^{2+}$ -Bpy complex at 522 nm at pH 7.0 and pH 2.5.

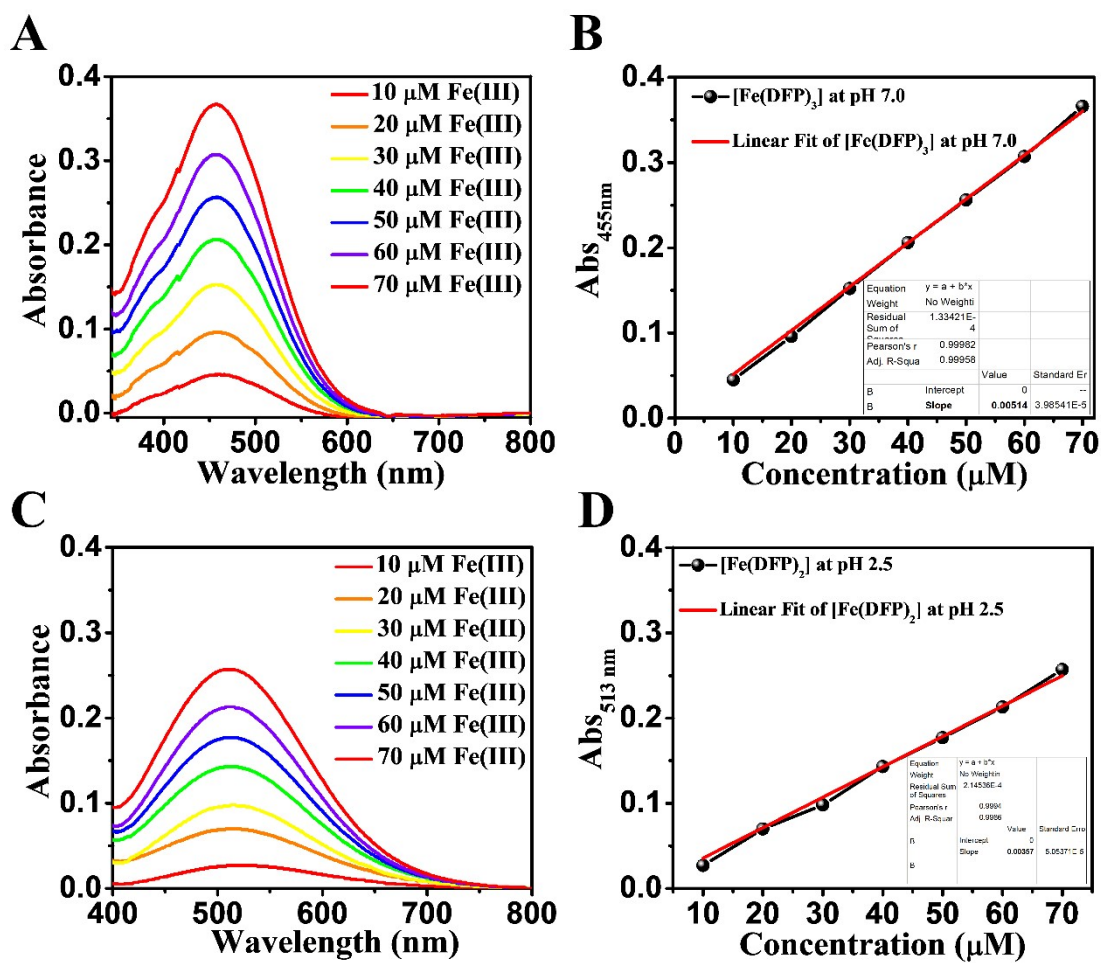

**Figure S5: Determination of molar absorptivity for the Fe(III)-DFP complex at pH 7.0 and pH 2.5.** The absorption spectra were obtained by monitoring the formation of  $\text{Fe}^{3+}$ -DFP complex at 455 nm and 513 nm at pH 7.0 and pH 2.5 respectively.

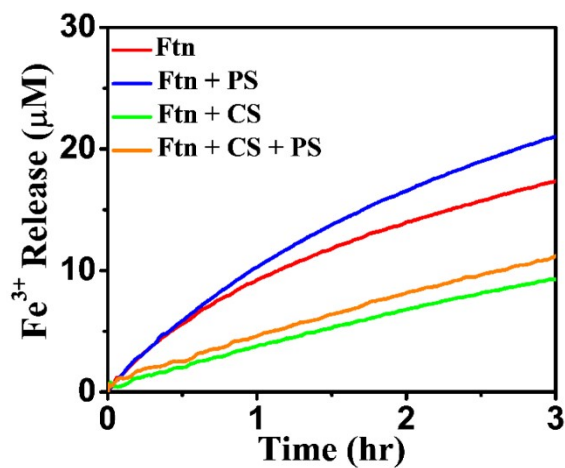

**Figure S6: Effect of chitosan on non-reductive iron mobilization under gastric condition.** Non-reductive iron mobilization facilitated by deferoxamine (DFO,  $\text{Fe}^{3+}$  chelator) from bare and chitosan-coated mineralized ferritin under gastric conditions. The kinetics of  $\text{Fe}^{3+}$  mobilization was obtained by monitoring formation of  $\text{Fe}^{3+}$ -DFO complex at 425 nm at pH 2.5.

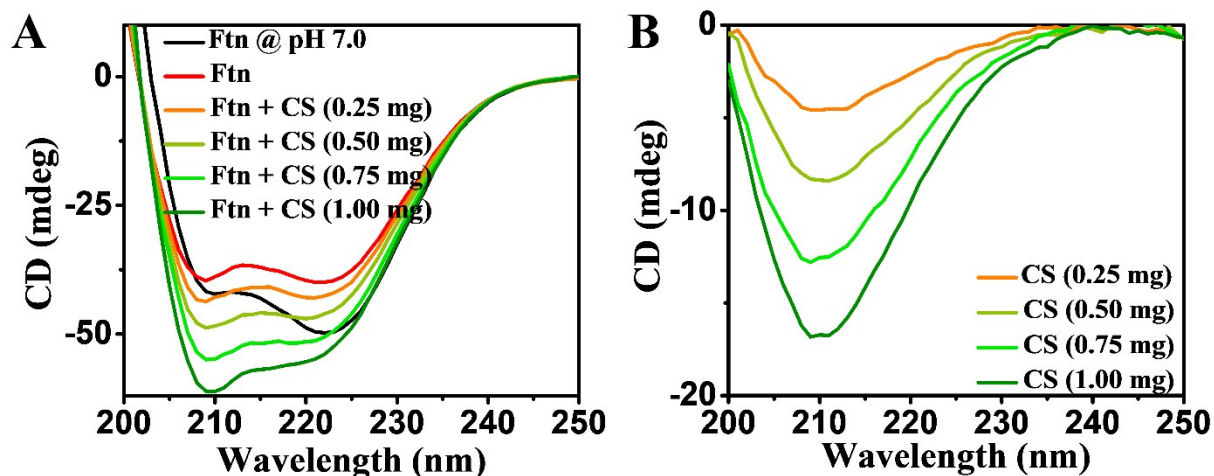

**Figure S7: Effect of chitosan and pepsin on ferritin protein structure and stability.** Circular Dichroism spectra of bare and chitosan-coated ferritin samples; (A) Interaction study between ferritin and chitosan (0.25 – 1 mg/mL). (B) CD spectra of chitosan (0.25 – 1 mg/mL) Both experiments were carried out in pH 2.5 in the absence of pepsin.

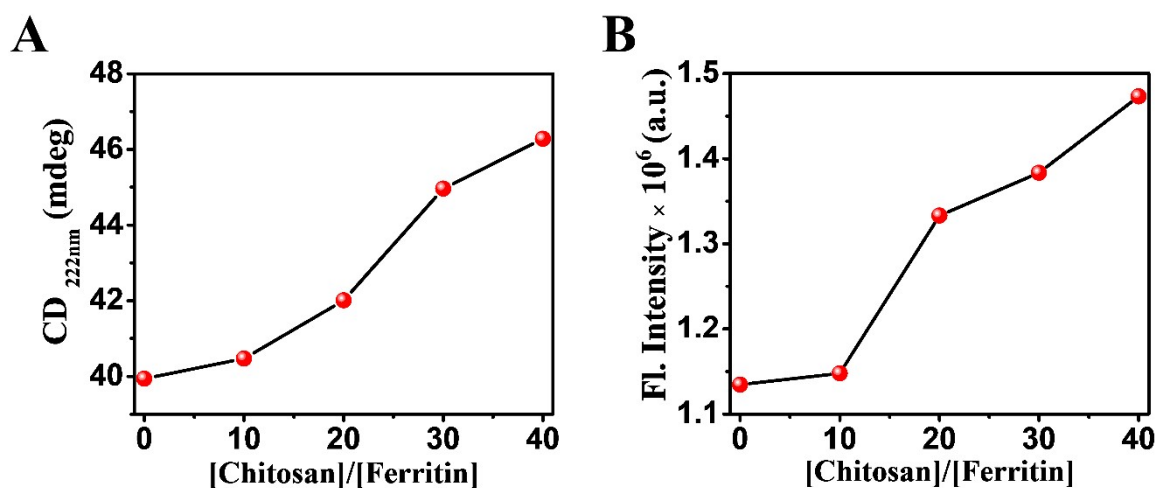

**Figure S8: Restoration of CD and Fluorescence signal of ferritin upon chitosan titration.** A. CD signal at 222 nm and B. fluorescence intensity at 330 nm plotted as a function of [Chitosan]/[ferritin] molar ratios at gastric pH 2.5.



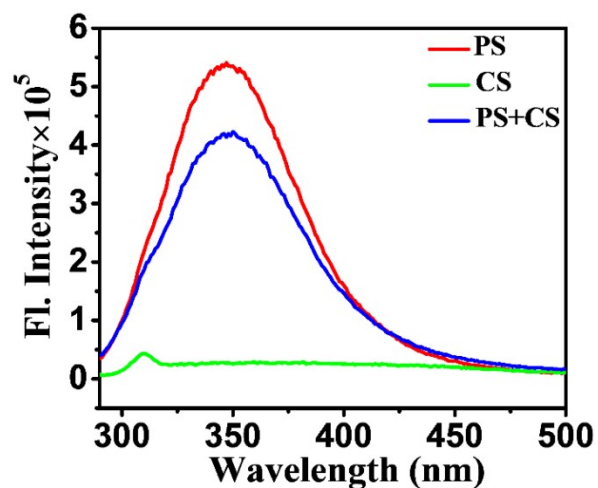

**Figure S9:** Fluorescence analysis of chitosan-pepsin interaction. Emission spectra ( $\lambda_{\text{ex}}$  280 nm) of pepsin and chitosan at 1:1 ratio in gastric pH 2.5.

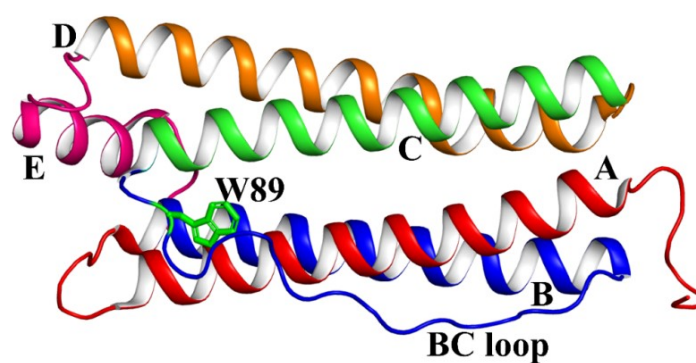

**Figure S10:** Cartoon representation of frog M ferritin subunit, where tryptophan (W) (green color) located at 89 position in the sequence (BC loop) is highlighted in stick form. The image was generated using PyMOL (PDB ID-3KA3).

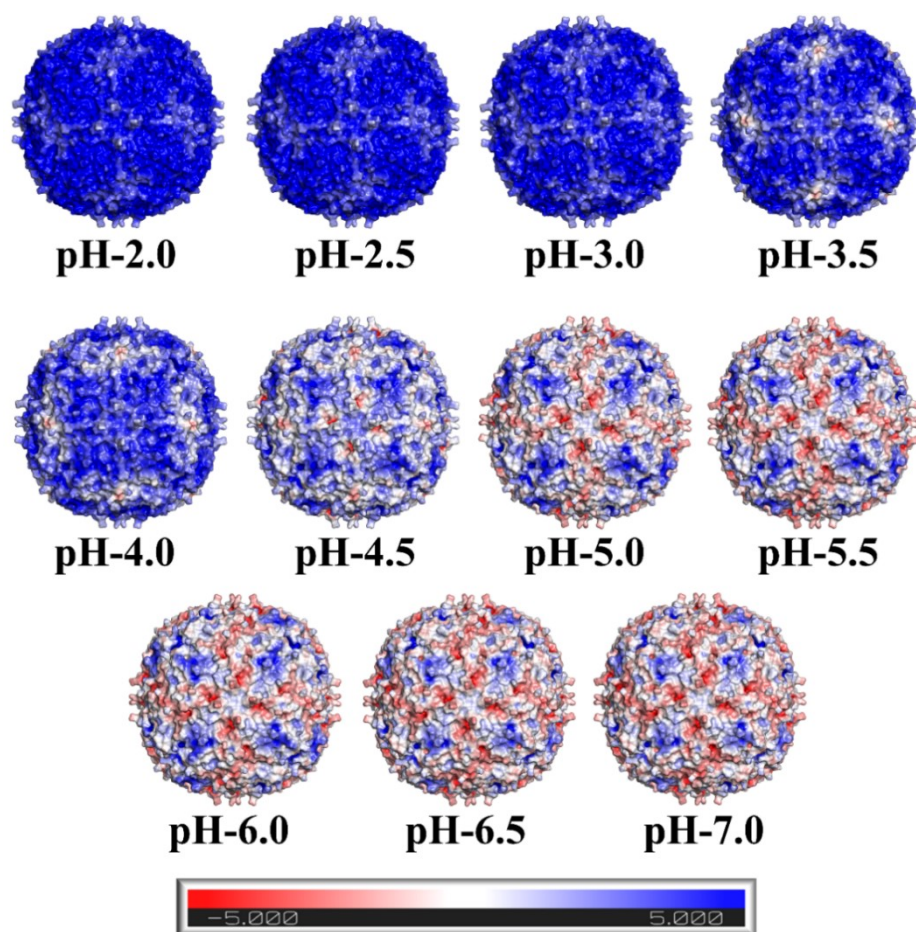

**Figure S11: Effect of pH on the surface electrostatics of ferritin protein.** pH dependent electrostatic analysis of frog M ferritin (PDB:1MFR). The surface electrostatics (the electrostatic potential expressed in the units of  $\pm 5 k_B T/e$ ) is generated by using ABPS tool in PyMOL. The blue, white and red shades represent the presence of positively, neutrally and negatively charged amino acid residues respectively.



## RAW DATA FOR FIGURE - 2, 3, 6, S2

Figure-2

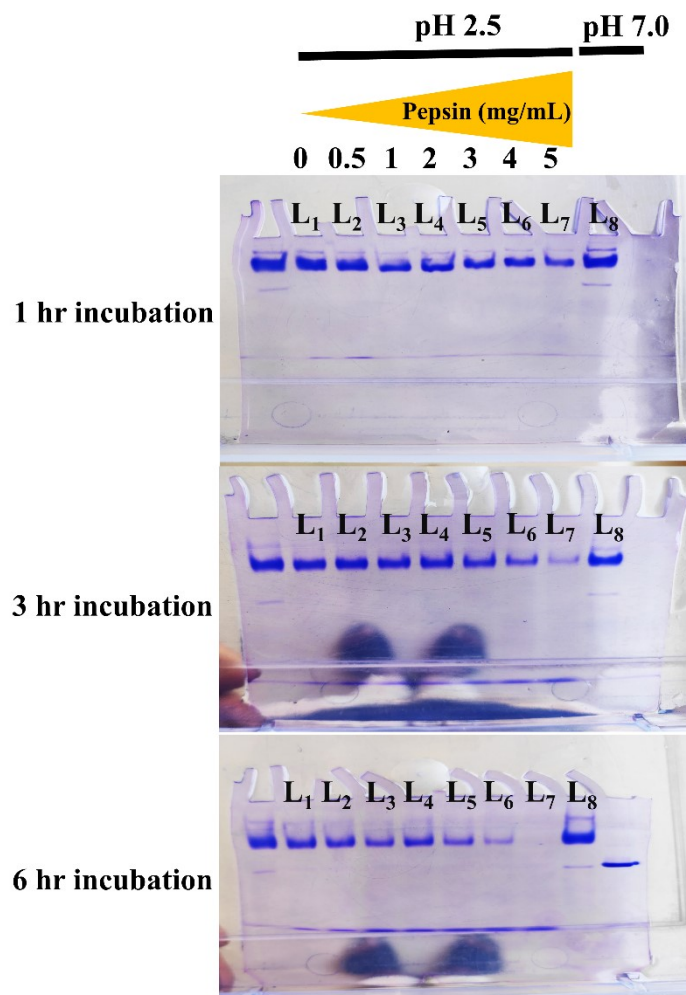

**Figure-2: Effect of gastric pH and pepsin concentration on cage integrity of ferritin protein:** Native PAGE analysis for the digestive stability of apo-ferritin against pH 2.5 and increasing concentration of pepsin (0 – 5 mg/mL; L<sub>1</sub> to L<sub>7</sub>). Control (L<sub>8</sub>): apo-ferritin sample at pH 7.0 in the absence of pepsin. Ferritin concentration was maintained at 1 mg/mL in the reaction solutions.

**Figure-3: Prussian (Iron) Staining**

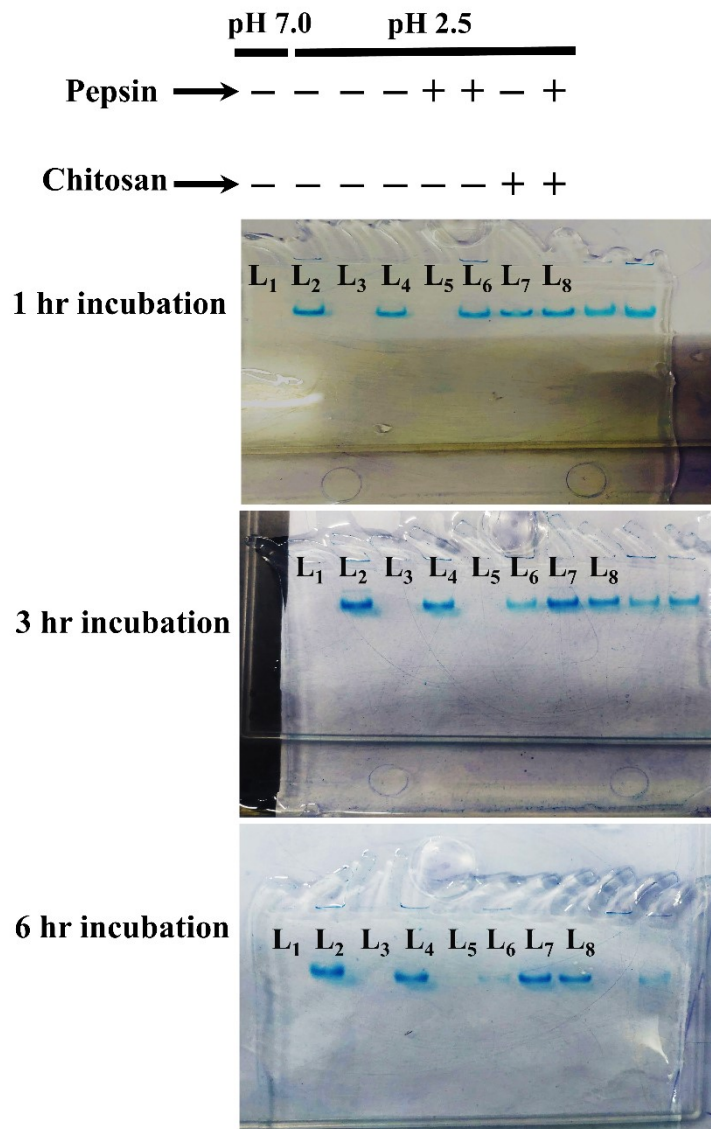

**Figure-3: Coomassie (Protein) Staining Data**

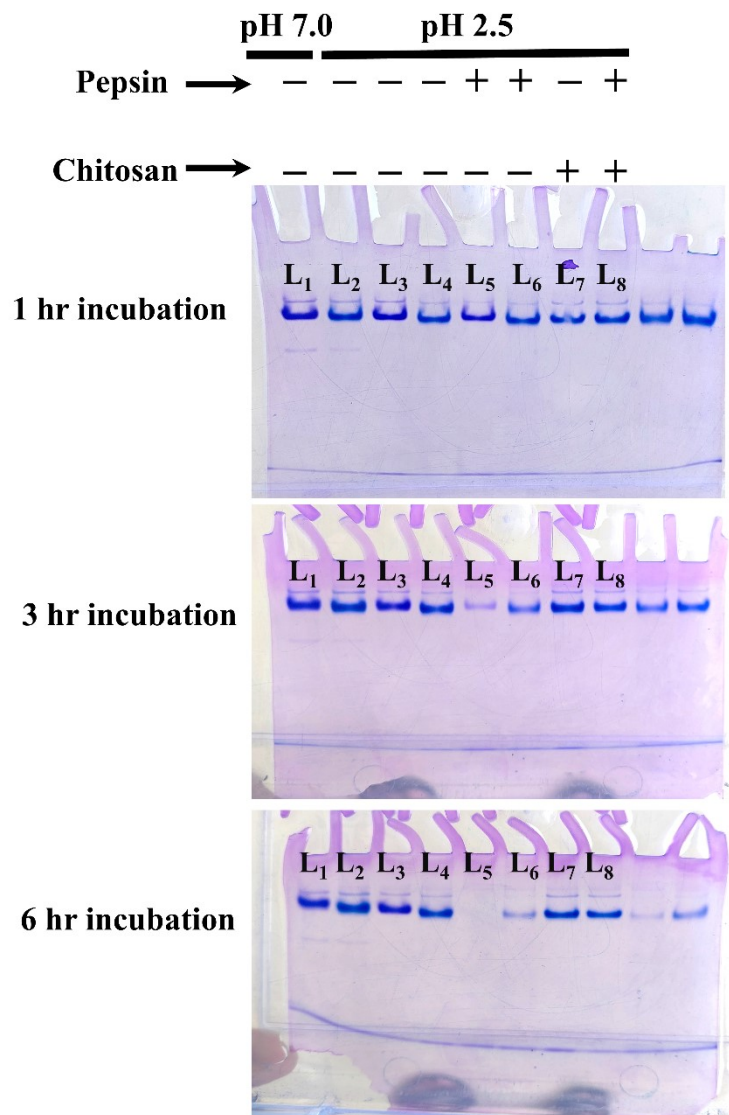

**Figure 3: Native PAGE analysis of digestive stability of bare and chitosan-fabricated ferritin protein cage and its iron bio-mineral under gastric conditions.** Apo and mineralized ferritin protein samples were run in a 5% (w/v) native gel at 100 V for 1.5 hr and was treated with acidified  $K_4Fe(CN)_6$  solution to visualize the encapsulated ferric iron mineral (by formation of Prussian blue precipitate) followed by visualization of ferritin protein cage by Coomassie staining.

**Figure-6**

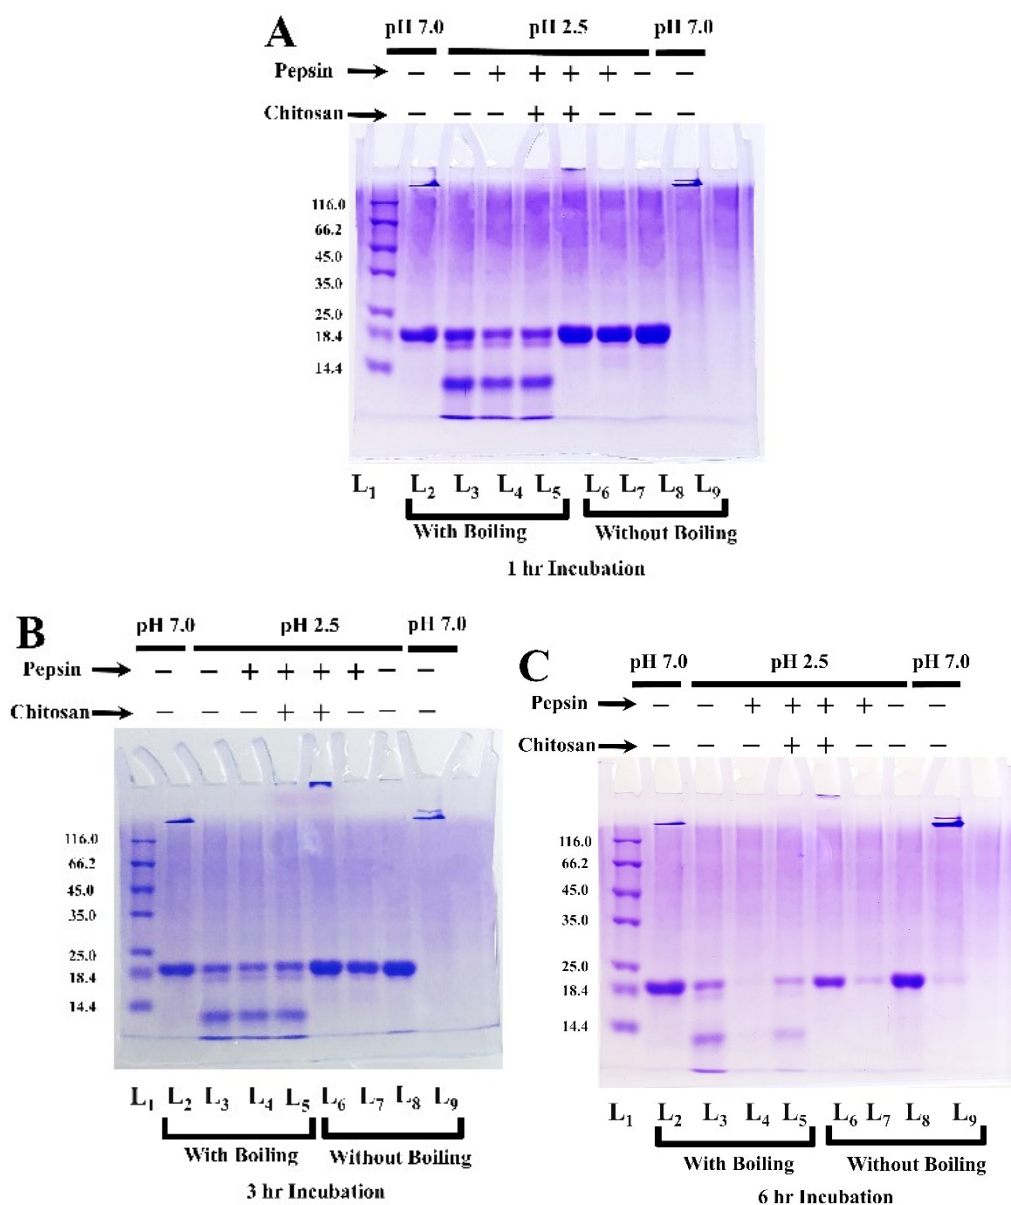

**Figure 6: Analysis of SGF treated bare and chitosan-fabricated ferritin degradation by SDS-PAGE.** The fragmentation pattern of bare and chitosan-modified ferritin complex in presence and absence of pepsin at pH 2.5 analyzed with boiling (L<sub>2</sub>, L<sub>3</sub>, L<sub>4</sub>, L<sub>5</sub> : samples were boiled for 15 mins before loading) and without boiling (L<sub>6</sub>, L<sub>7</sub>, L<sub>8</sub>, L<sub>9</sub>) for three different incubation periods: (A) 1hr, (B) 3hr, and (C) 6hr. L<sub>2</sub> & L<sub>9</sub> – ferritin at pH 7.0 taken as control. Concentrations of ferritin, chitosan and pepsin were maintained at 1 mg/mL in the reaction mixture. (+) and (-) signs represent the presence and absence of chitosan/pepsin. L<sub>1</sub>: protein ladder.

**Figure-S2**

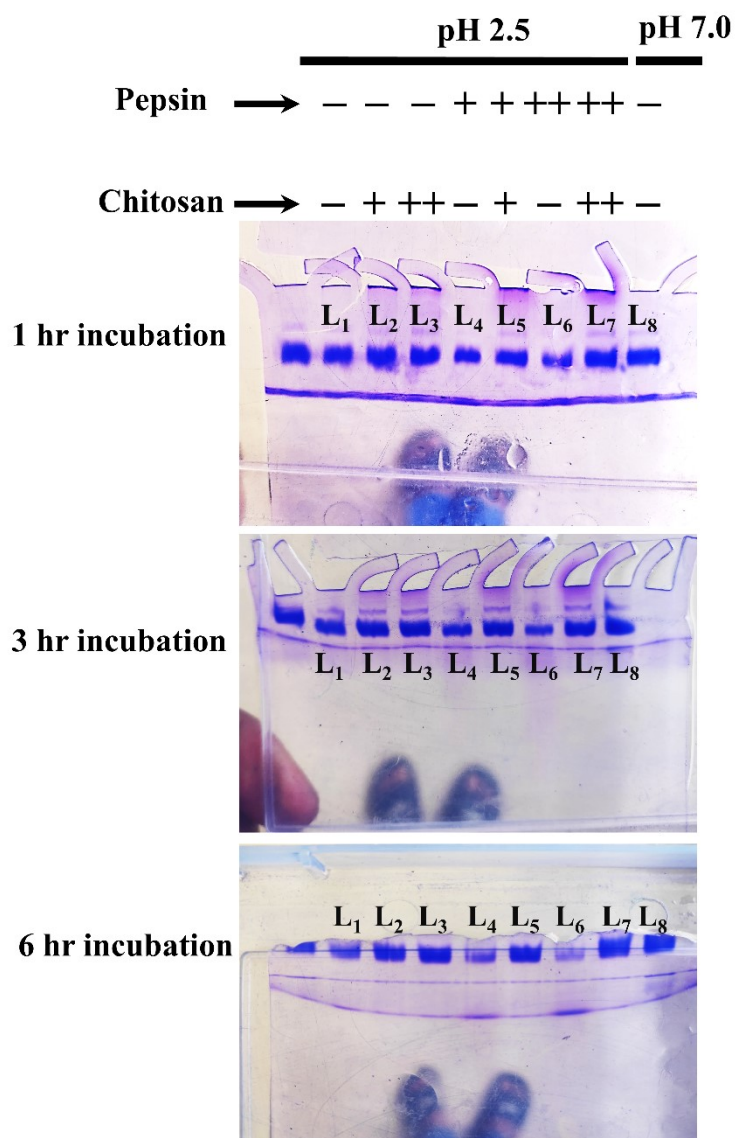

**Figure S2: Effect of chitosan on stability of ferritin protein cage under gastric conditions.** Native PAGE analysis for the digestive stability of bare apo-ferritin samples.
